# Supplementary material for: Physiological and Transcriptomic Responses of Illicium difengpi to Drought Stress
Source: MDPI journal article supplement (doi:10.3390/su14127479), 2022-06-19
Supplement: s1 [file s1]

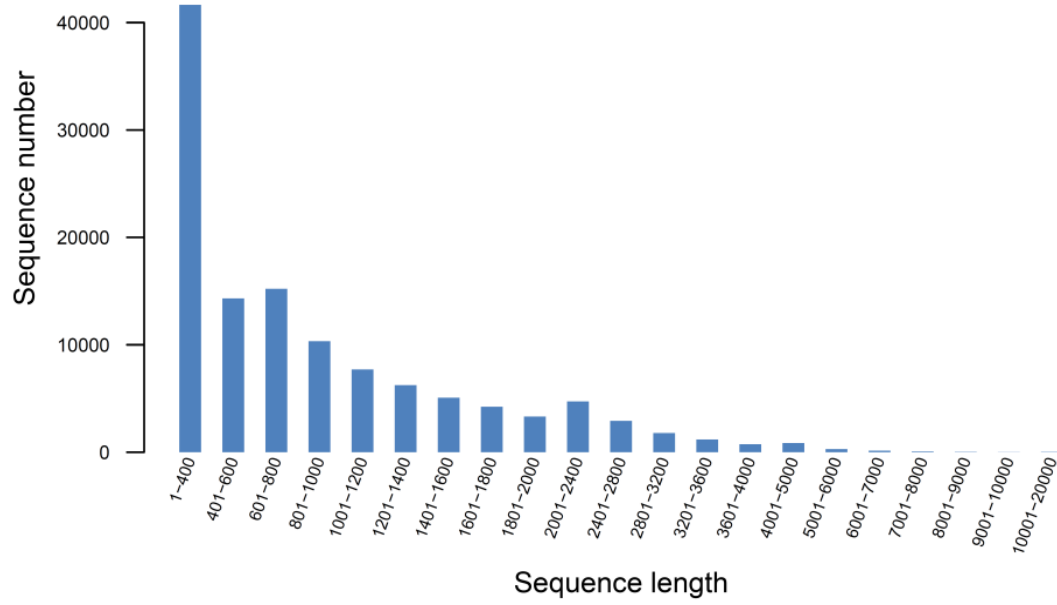

**Figure S1.** Length distribution of assembled unigenes. The x-axis indicates the sequence length of unigenes, and the y-axis indicates the numbers of assembled unigenes.
