# Supplementary material for: Physiological and Transcriptomic Responses of Illicium difengpi to Drought Stress
Source: MDPI journal article supplement (doi:10.3390/su14127479), 2022-06-19
Supplement: s1 [file s1]

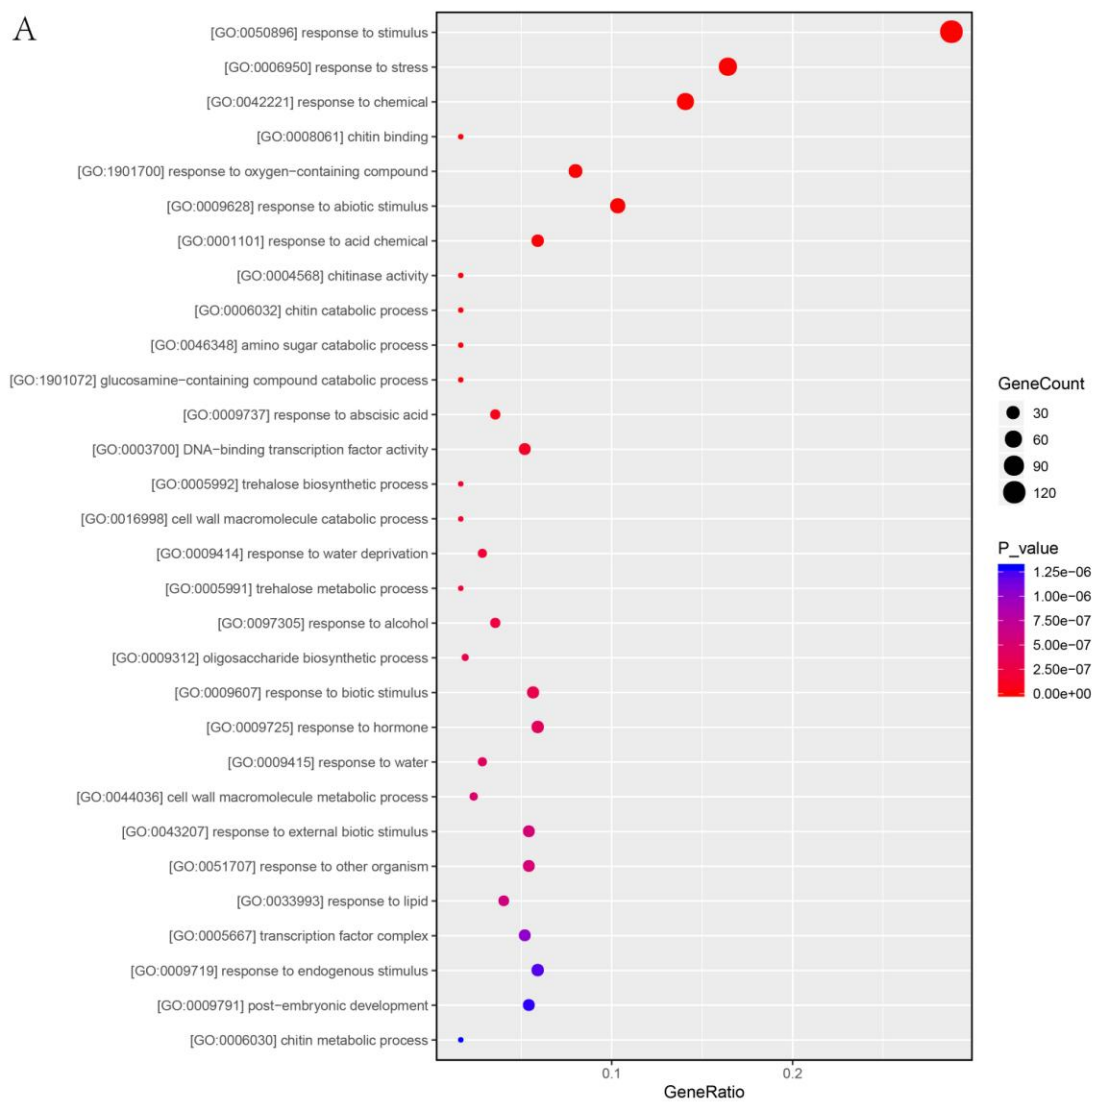

( A ) GO enrichment analysis of the early upregulated genes

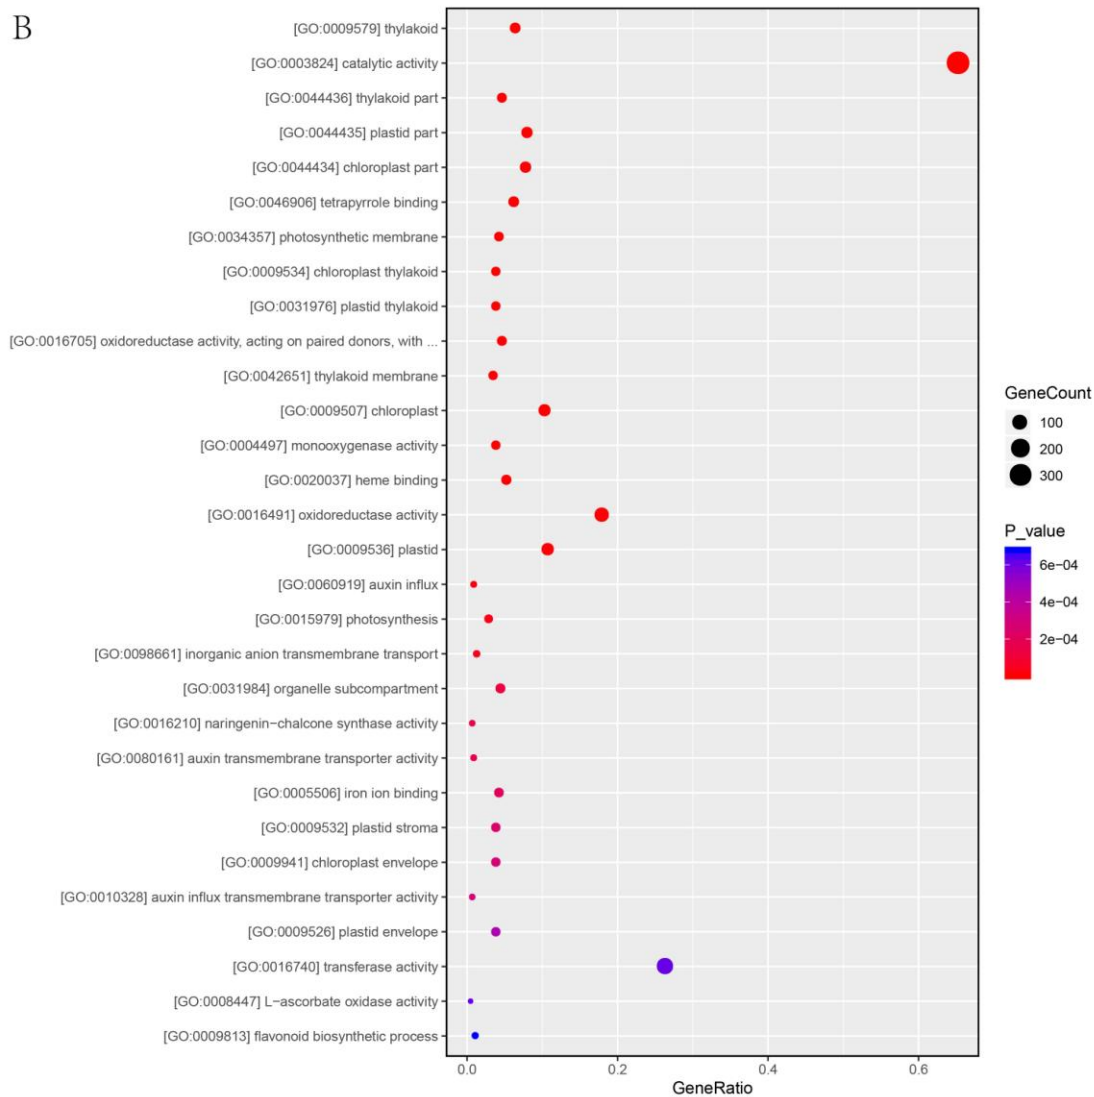

( B ) GO enrichment analysis of the early downregulated genes

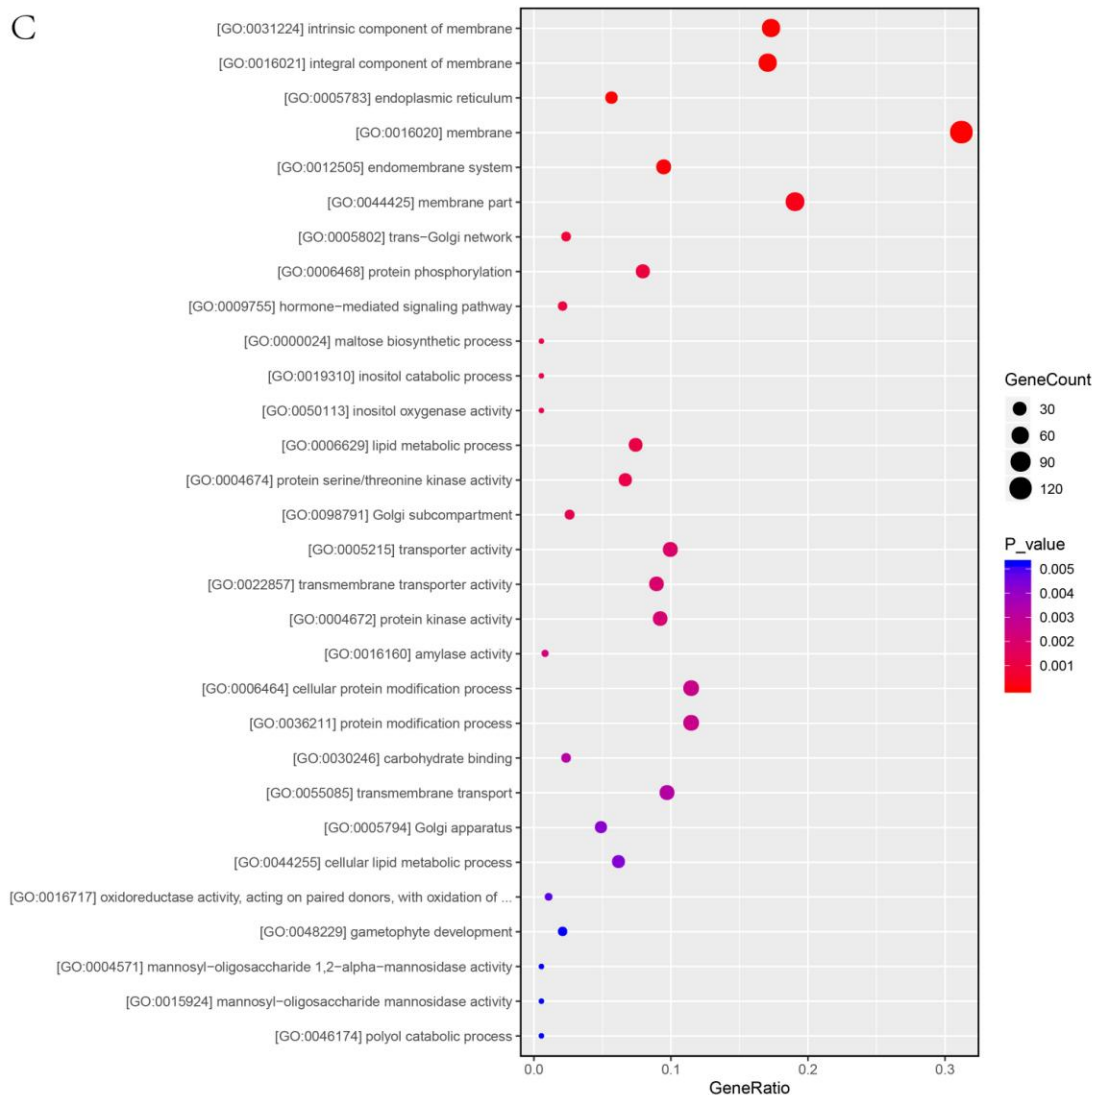

( C ) GO enrichment analysis of the late upregulated genes

D

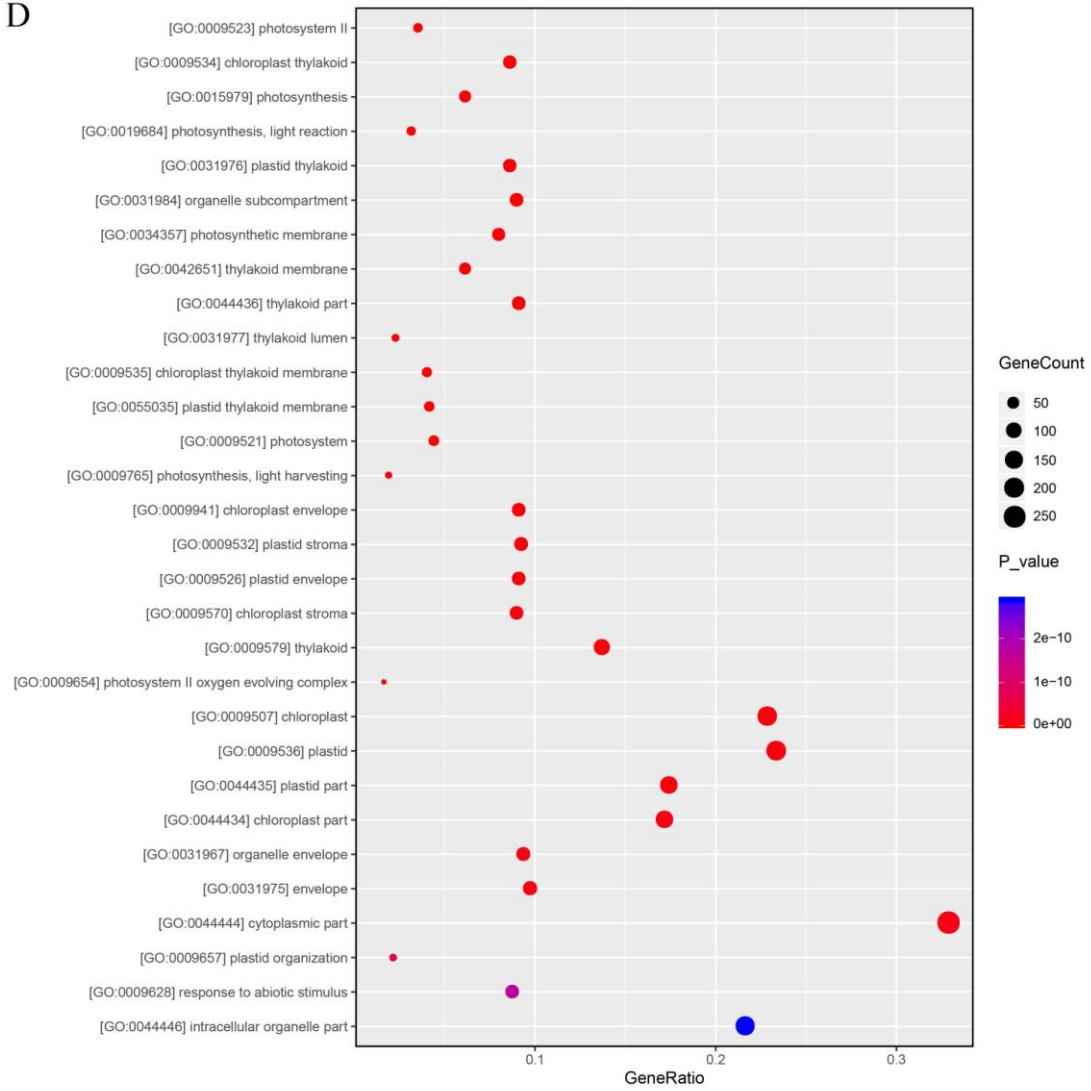

( D ) GO enrichment analysis of the late downregulated genes

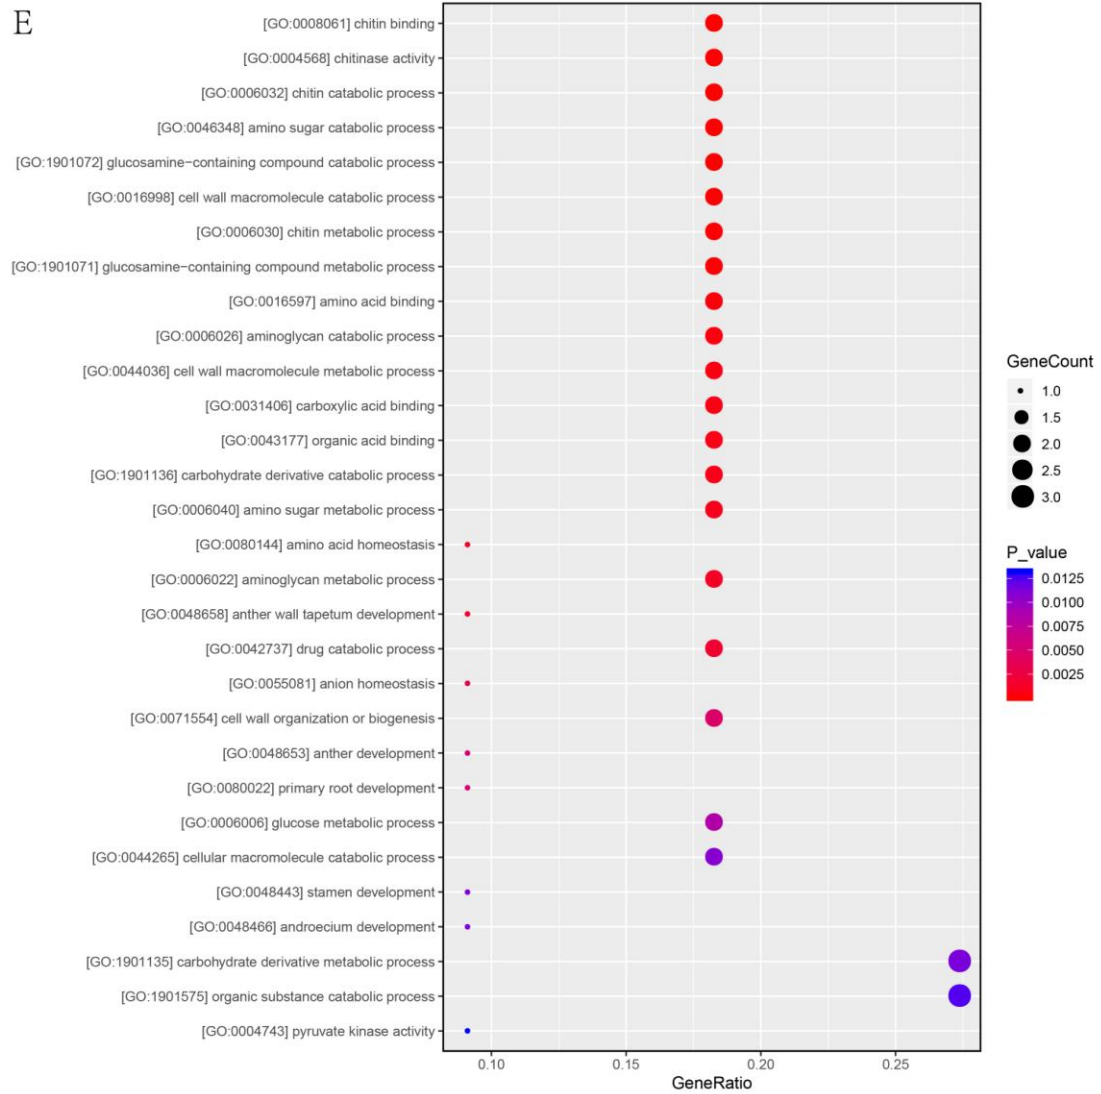

( E ) GO enrichment analysis of the continuously upregulated genes

F

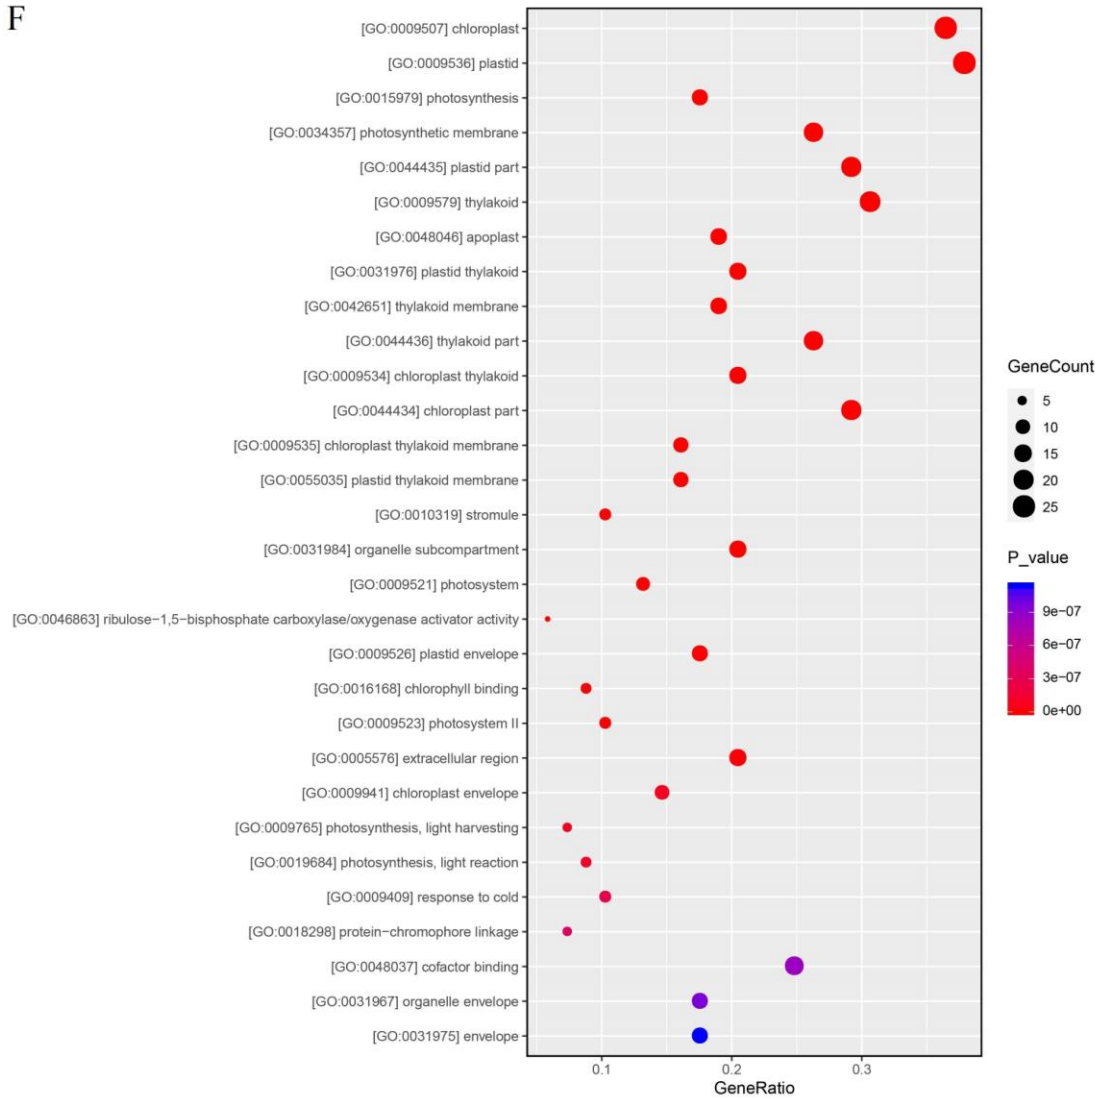

( F ) GO enrichment analysis of the continuously downregulated genes

**Figure S3.** GO enrichment analysis of different clusters of DEGs.
