# Supplementary material for: Physiological and Transcriptomic Responses of Illicium difengpi to Drought Stress
Source: MDPI journal article supplement (doi:10.3390/su14127479), 2022-06-19
Supplement: s1 [file s1]

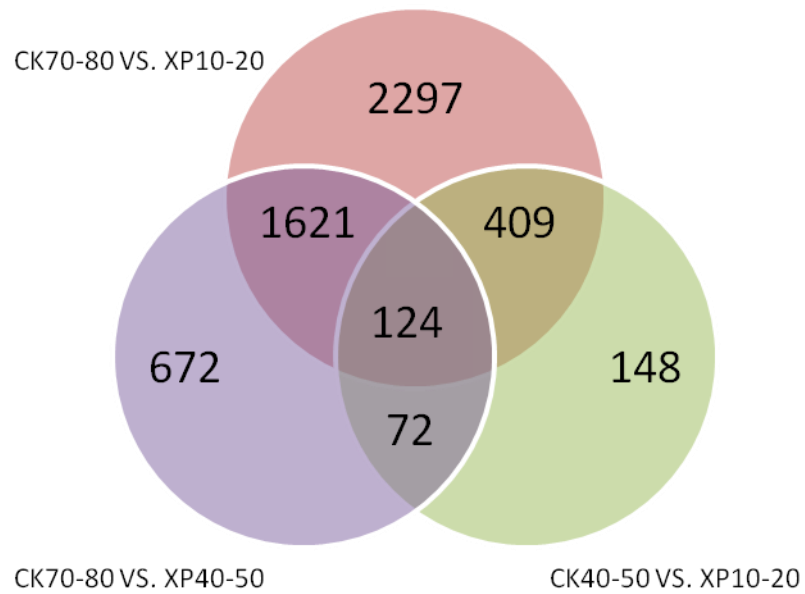

**Figure S2.** Venn diagrams of DEGs across all comparisons. The circles in different colours represent three comparisons: red: CK70~80 vs. XP10~20, purple: CK70~80 vs. XP40~50, green: XP40~50 vs. XP10~20. The figures in the overlapping area are the number of common DEGs of two or three comparisons. The figures in the nonoverlapping regions are the number of unique DEGs of each comparison.
